# Supplementary material for: Faroese whole genomes provide insight into ancestry and recent selection
Source: eLife. 2026 Jun 16;14:RP107428. doi: 10.7554/eLife.107428 (PMC13271744; doi:10.7554/eLife.107428)
Supplement: Supplementary file 1. — Unique identifier (subject), sex, region, mean WGS depth (mean_depth), mean depth on X chromosome (mean_depth_chrX), mean depth on Y chromosome (mean_depth_chrY), median insert size (insert_median), mean absolute deviation of insert size (insert_mad), contamination estimate (contamination), and number of genotype calls with GQ >20 (non_imputed_calls). The Faroes region labels are: VM = Vágar and Mykines; SR = Suðuroy; SM = Suðurstreymoy; SD = Sandoy, Skúvoy, Stóra Dímun; NG = Norðoyggjar; and EN = Eysturoy og Norðstreymoy. [file elife-107428-supp1.xlsx]

## Sheet: 1. WGS QC Metrics
subject	sex	region	mean_depth	mean_depth_chrX	mean_depth_chrY	insert_median	insert_mad	contamination	non_imputed_calls
Faroes1	f	NG	14.9093	15.45	0.48	518	78	1.49e-08	18867352
Faroes2	f	NG	16.8119	16.89	0.52	507	75	5.45e-09	19277223
Faroes3	m	EN	12.6269	6.64	2.48	507	74	2.98e-08	16542300
Faroes4	f	SR	12.7647	12.94	0.42	533	78	0.00156367	16808226
Faroes5	m	VM	10.5106	5.49	2.28	539	78	8.62e-09	14392348
Faroes6	m	VM	21.9026	11.5	4.6	489	72	1.02e-08	19586097
Faroes7	f	EN	13.383	13.84	0.4	521	77	0.00187269	16969091
Faroes8	m	VM	18.6609	9.69	4.07	478	77	2.21e-08	20161811
Faroes9	m	SR	22.7775	11.82	4.17	491	70	2.67e-09	20312192
Faroes10	f	SM	23.2137	23.29	0.62	454	70	9.39e-06	20261623
Faroes11	f	SR	14.8132	15.17	0.44	510	75	3.32e-06	17715057
Faroes12	f	NG	21.3046	21.3	0.68	547	79	2.96e-06	19572898
Faroes13	f	SM	23.5891	23.71	0.74	483	68	2.28e-06	20133366
Faroes14	m	EN	20.8581	10.9	4.35	447	67	1.23e-09	19863087
Faroes15	f	SD	18.6352	18.53	0.53	485	78	2.32e-06	20130977
Faroes16	m	SM	20.5924	10.77	4.57	533	78	2.43e-08	19593035
Faroes17	f	NG	30.7299	30.43	0.73	455	69	3.54e-06	20412896
Faroes18	m	NG	20.8755	10.94	4.63	525	77	8.34e-09	19650019
Faroes19	m	EN	15.3962	8	3.4	501	76	9.55e-05	17501293
Faroes20	f	SM	13.0032	13	0.36	522	76	0.000348684	16050135
Faroes21	m	VM	20.354	10.65	4.36	524	77	2.57e-10	19618144
Faroes22	m	SR	20.2455	10.62	4.37	520	77	3.59e-09	19498920
Faroes23	f	SD	12.9639	12.96	0.35	462	69	5.13e-08	17245595
Faroes24	m	SR	16.7486	8.75	3.49	494	75	9.23e-11	18463036
Faroes25	f	SR	20.726	20.92	0.7	522	76	1.34e-06	19486503
Faroes26	f	VM	23.9787	24.03	0.72	488	74	6.36e-05	20237212
Faroes27	f	SD	20.7684	20.93	0.57	477	72	3.98e-10	19965584
Faroes28	m	SM	19.5486	10.21	4.29	526	77	8.99e-09	19386663
Faroes29	m	SM	23.7314	12.38	4.95	454	71	1.61e-08	20337578
Faroes30	m	NG	19.5986	10.28	4.24	510	75	2.32e-07	19360819
Faroes31	f	EN	19.9618	19.65	0.63	459	71	8.48e-09	19789946
Faroes32	m	SM	18.1144	9.38	3.77	491	76	7.75e-08	18624113
Faroes33	m	SD	19.8459	10.45	4.45	528	76	1.44e-08	19367447
Faroes34	m	SR	19.6057	10.14	4.03	516	76	5.56e-05	19538244
Faroes35	m	EN	31.4661	16.47	6.72	456	71	1.62e-06	20553229
Faroes36	f	EN	18.191	18.17	0.57	476	75	1.3e-07	19637857
Faroes37	f	SD	18.439	18.4	0.62	534	78	4.21e-08	19105145
Faroes38	m	SD	19.6665	10.31	4.31	523	76	1.48e-09	19416360
Faroes39	m	SD	9.86453	5.12	2.08	474	76	2.96e-08	15625196
Faroes40	f	SR	25.4029	25.55	0.84	455	71	5.19e-06	20371752
