# Supplementary material for: Faroese whole genomes provide insight into ancestry and recent selection
Source: eLife. 2026 Jun 16;14:RP107428. doi: 10.7554/eLife.107428 (PMC13271744; doi:10.7554/eLife.107428)
Supplement: Supplementary file 2. — Variants in the joint call set with CADD >30 and at least two minor alleles observed in Faroese individuals, and no minor alleles observed in Finnish or Northern European reference individuals. Allele frequencies in Faroese individuals (af_FARO), allele frequencies in 1000 Genomes British (af_GBR), Central European (af_CEU), and Finnish (af_FIN), and allele frequencies in 1000 G Europeans (af_1000 G_EUR) and gnomAD (af_GNOMAD) references. [file elife-107428-supp2.xlsx]

## Sheet: 2. Faroese Functional Alleles
chromosome	position	ref	alt	variant_id	dbsnp_rsid	vep_consequence	vep_gene_id	vep_gene_name	cadd_score	af_FARO	af_GBR	af_CEU	af_FIN	af_1000G_EUR	af_GNOMAD
chr1	230997268	G	A	chr1_230997268_G_A	rs200114138	splice_donor_variant	ENSG00000173409	ARV1	33	0.0375	0	0	0	0	0.000387801
chr1	39437792	G	A	chr1_39437792_G_A	rs201968058	missense_variant	ENSG00000127603	MACF1	32	0.025	0	0	0	0	0.000348308
chr1	46352969	C	T	chr1_46352969_C_T	rs143455777	stop_gained	ENSG00000117481	NSUN4	48	0.025	0	0	0	0	8.54e-05
chr1	99875394	C	T	chr1_99875394_C_T	rs113994128	stop_gained	ENSG00000162688	AGL	39	0.025	0	0	0	0	1.97e-05
chr10	68166498	T	C	chr10_68166498_T_C	rs779148735	missense_variant	ENSG00000138347	MYPN	31	0.025	0	0	0	0	1.97e-05
chr10	72196991	T	C	chr10_72196991_T_C	rs1281256224	splice_acceptor_variant	ENSG00000138303	ASCC1	34	0.0375	0	0	0	0	6.57e-06
chr10	77821126	G	A	chr10_77821126_G_A	rs143605373	missense_variant	ENSG00000151208	DLG5	31	0.0375	0	0	0	0	0.000216797
chr11	119088285	C	T	chr11_119088285_C_T	rs189159450	missense_variant	ENSG00000256269	HMBS	32	0.0375	0	0	0	0	1.97e-05
chr11	125625996	G	A	chr11_125625996_G_A	rs556405813	5_prime_UTR_variant	ENSG00000149554	CHEK1	38	0.025	0	0	0	0	0.00139257
chr11	92836701	C	T	chr11_92836701_C_T	rs200404766	missense_variant	ENSG00000165323	FAT3	33	0.025	0	0	0	0	0.00142012
chr12	96630614	A	T	chr12_96630614_A_T		stop_gained	ENSG00000188596	CFAP54	36	0.05	0	0	0	0	0
chr13	102741822	C	A	chr13_102741822_C_A		stop_gained	ENSG00000175820	CCDC168	33	0.0375	0	0	0	0	0
chr14	44945187	G	A	chr14_44945187_G_A	rs200256990	missense_variant	ENSG00000179454	KLHL28	31	0.0375	0	0	0	0	0.000164314
chr14	88505371	G	A	chr14_88505371_G_A	rs141615591	missense_variant	ENSG00000070778	PTPN21	31	0.0625	0	0	0	0	0.000361557
chr15	33857811	T	G	chr15_33857811_T_G		missense_variant	ENSG00000198838	RYR3	33	0.05	0	0	0	0	0
chr15	91002181	C	T	chr15_91002181_C_T	rs139709507	missense_variant	ENSG00000184056	VPS33B	31	0.025	0	0	0	0.00198807	0.000906583
chr17	42787311	C	T	chr17_42787311_C_T	rs200593980	stop_gained	ENSG00000126562	WNK4	39	0.0625	0	0	0	0	0.000164316
chr17	4818511	G	T	chr17_4818511_G_T	rs199553650	missense_variant	ENSG00000129219	PLD2	33	0.025	0	0	0	0	0.000256508
chr18	63935132	C	T	chr18_63935132_C_T	rs138084090	stop_gained	ENSG00000242550	SERPINB10	34	0.025	0	0	0	0	0.000223428
chr2	241434972	C	T	chr2_241434972_C_T		stop_gained	ENSG00000006607	FARP2	44	0.0375	0	0	0	0	0
chr2	74558853	G	A	chr2_74558853_G_A	rs781778476	stop_gained	ENSG00000159374	M1AP	35	0.025	0	0	0	0	1.31e-05
chr3	111112083	A	T	chr3_111112083_A_T		stop_gained	ENSG00000177707	NECTIN3	37	0.025	0	0	0	0	0
chr3	120404935	C	T	chr3_120404935_C_T	rs757655104	missense_variant	ENSG00000163430	FSTL1	31	0.025	0	0	0	0	6.57e-06
chr3	121537164	G	A	chr3_121537164_G_A	rs367554352	stop_gained	ENSG00000051341	POLQ	39	0.025	0	0	0	0	2.63e-05
chr5	141398596	G	A	chr5_141398596_G_A	rs201846904	missense_variant	ENSG00000276547	PCDHGB5	31	0.0375	0	0	0	0	0.000630674
chr5	73568253	G	A	chr5_73568253_G_A	rs190252235	missense_variant	ENSG00000164338	UTP15	32	0.0375	0	0	0	0	0.00039441
chr6	145941873	A	G	chr6_145941873_A_G	rs201122184	missense_variant	ENSG00000146414	SHPRH	31	0.025	0	0	0	0	0.000453321
chr6	154091141	G	A	chr6_154091141_G_A	rs201847839	missense_variant	ENSG00000112038	OPRM1	31	0.025	0	0	0	0	1.97e-05
chr7	108065774	G	A	chr7_108065774_G_A	rs758145192	stop_gained	ENSG00000091128	LAMB4	40	0.0625	0	0	0	0	6.57e-06
chr7	143394199	G	A	chr7_143394199_G_A		stop_gained	ENSG00000146904	EPHA1	45	0.025	0	0	0	0	6.57e-06
chr8	131984972	G	A	chr8_131984972_G_A	rs778434355	missense_variant	ENSG00000132294	EFR3A	32	0.025	0	0	0	0	0
chr8	41536448	T	G	chr8_41536448_T_G	rs772213541	splice_donor_variant	ENSG00000147536	GINS4	35	0.025	0	0	0	0	7.23e-05
chr8	53229653	G	A	chr8_53229653_G_A	rs80036289	stop_gained	ENSG00000082556	OPRK1	38	0.025	0	0	0	0	0.000394623
chr9	114205760	G	T	chr9_114205760_G_T	rs749934331	missense_variant	ENSG00000196739	COL27A1	32	0.025	0	0	0	0	0
chr9	36121582	G	T	chr9_36121582_G_T		missense_variant	ENSG00000122707	RECK	32	0.025	0	0	0	0	0
