# Supplementary material for: Faroese whole genomes provide insight into ancestry and recent selection
Source: eLife. 2026 Jun 16;14:RP107428. doi: 10.7554/eLife.107428 (PMC13271744; doi:10.7554/eLife.107428)
Supplement: Supplementary file 3. — Counts of HLA-B alleles out of the total 80 haplotypes and mean quality scores in the Faroese WGS cohort, as well as HLA-B allele frequencies in three 1000 Genomes European cohorts (British [GBR], Central European [CEU], and Finnish [FIN]). HLA genotypes were determined using HLA*LA. [file elife-107428-supp3.xlsx]

## Sheet: 3. HLA-B Allele Counts
hla_allele	ac_FARO	Q_FARO	af_FARO	af_GBR	af_CEU	af_FIN	note
B*07:02:01G	14	0.856	0.175	0.121	0.167	0.131
B*15:01:01G	8	0.997	0.1	0.022	0.056	0.111
B*57:01:01G	8	0.901	0.1	0.055	0.066	0.03
B*45:01:01G	6	0.916	0.075	0.011	0	0
B*18:01:01G	5	1	0.0625	0.011	0.015	0.025
B*08:01:01G	4	0.808	0.05	0.093	0.096	0.066
B*27:05:02G	4	0.995	0.05	0.066	0.02	0.076
B*44:02:01G	4	0.987	0.05	0.099	0.126	0.061
B*35:01:01G	3	1	0.0375	0.049	0.04	0.157
B*49:01:01G	3	0.999	0.0375	0	0.015	0
B*14:01:01	2	0.961	0.025	0.016	0.015	0
B*37:01:01G	2	1	0.025	0.011	0.01	0.005
B*40:01:01G	2	0.997	0.025	0.077	0.071	0.076
B*44:04	2	0.981	0.025	0	0	0
B*51:01:01G	2	0.999	0.025	0.044	0.03	0.025
B*51:08:01	2	1	0.025	0	0	0
B*07:05:01G	1	1	0.0125	0	0	0	detected as "B*07:05:01;B*07:06" by HLA*LA
B*07:189	1	0.992	0.0125	0	0	0
B*15:08:01	1	0.013	0.0125	0	0	0
B*15:24:01	1	1	0.0125	0	0	0
B*15:87	1	1	0.0125	0	0	0
B*27:01	1	0.02	0.0125	0	0	0
B*35:01:33	1	0.612	0.0125	0	0	0
B*39:01:01G	1	0.999	0.0125	0.016	0.005	0.03
B*39:06:02	1	1	0.0125	0.016	0.01	0
