# Supplementary material for: Faroese whole genomes provide insight into ancestry and recent selection
Source: eLife. 2026 Jun 16;14:RP107428. doi: 10.7554/eLife.107428 (PMC13271744; doi:10.7554/eLife.107428)
Supplement: Supplementary file 4. — Genomic regions for the top 10 standardized iHS and XPEHH values in the Faroese WGS cohort. We list the number of variants and all variant IDs in these regions which reach the p-value threshold corresponding to FDR <0.01 (iHS: p<2.72 × 10–6; XPEHH: p<2.35 × 10–6). The regions are defined by the first and last variant position with a p-value below the cutoff for each particular statistic, as indicated in the ‘statistic’ column. Protein-coding gene name(s), if any, with annotated variants reaching these thresholds are provided. We additionally provide the maximum absolute value of the given statistic (‘max_statistic’), its corresponding p-value and q-value (i.e. the minimum FDR when that particular test is considered significant), and the allele frequencies in the Faroese and British cohorts for the variant(s) with the maximum value. The variant(s) with the maximum value for each region are highlighted in bold font. [file elife-107428-supp4.xlsx]

## Sheet: 4. Signals of Positive Selectio
region	gene	statistic	n_variants	variants	max_statistic	p_value	q_value	af_FARO	af_GBR
chr1:20011608-20096717	PLA2G5	XPEHH	33	chr1_20076300_A_C,chr1_20076605_G_A,chr1_20012301_A_C,chr1_20082881_A_C,chr1_20076193_G_A,chr1_20076274_T_C,chr1_20076011_A_C,chr1_20076112_G_A,chr1_20011774_A_G,chr1_20076197_C_A,chr1_20011608_C_T,chr1_20078030_C_T,chr1_20080093_G_A,chr1_20078672_G_A,chr1_20094636_G_A,chr1_20095119_G_T,chr1_20094554_G_C,chr1_20080597_A_C,chr1_20077562_G_A,chr1_20077563_A_G,chr1_20077651_T_C,chr1_20095906_T_C,chr…	5.4737	4.40727e-08	0.00113536	0.6625	0.355556
chr2:3494099-3600596	ADI1;COLEC11	iHS	36	chr2_3511937_C_T,chr2_3512298_A_T,chr2_3512314_C_T,chr2_3515968_C_A,chr2_3599390_G_A,chr2_3597565_C_A,chr2_3504437_G_C,chr2_3507273_C_A,chr2_3510084_G_A,chr2_3510504_C_T,chr2_3511095_C_T,chr2_3502748_C_T,chr2_3600300_G_A,chr2_3600596_C_G,chr2_3505223_C_T,chr2_3499161_G_A,chr2_3499337_C_T,chr2_3499458_C_T,chr2_3499473_C_T,chr2_3499498_C_T,chr2_3499996_T_C,chr2_3500302_G_A,chr2_3497585_G_A,chr2_351…	8.38949	4.88e-17	8.97937e-12	0.9375	0.8736
chr2:106664119-106684689	intergenic	XPEHH	22	chr2_106674133_A_G,chr2_106674181_C_A,chr2_106671006_C_G,chr2_106667533_T_C,chr2_106668298_C_T,chr2_106669836_C_T,chr2_106675214_C_T,chr2_106670001_C_T,chr2_106675518_A_G,chr2_106673744_A_T,chr2_106678470_G_T,chr2_106664119_C_T,chr2_106664645_A_G,chr2_106671177_C_T,chr2_106681295_C_A,chr2_106670096_A_G,chr2_106676019_G_A,chr2_106683150_T_G,chr2_106684689_G_T,chr2_106675514_C_A,chr2_106676197_C_T,…	5.5727	2.50819e-08	0.000886915	0.05	0.0888889
chr3:26300600-26308988	intergenic	XPEHH	3	chr3_26308988_T_G,chr3_26300600_G_A,chr3_26301301_A_G	5.50484	3.69503e-08	0.00107859	0.1125	0.1813
chr3:50844563-50915503	DOCK3	iHS	18	chr3_50850431_C_T,chr3_50849318_C_T,chr3_50853838_A_T,chr3_50853553_A_T,chr3_50851246_C_T,chr3_50850107_G_A,chr3_50844563_T_C,chr3_50890815_T_C,chr3_50854455_G_A,chr3_50889578_T_C,chr3_50853408_T_A,chr3_50859955_G_A,chr3_50857354_C_G,chr3_50859884_T_C,chr3_50859560_C_A,chr3_50862672_C_G,chr3_50862923_C_T,chr3_50915503_G_T	-13.5329	9.99462e-42	4.77907e-35	0.175	0.08791
chr3:121009234-121335758	STXBP5L	iHS	76	chr3_121065821_G_A,chr3_121062442_T_C,chr3_121054655_G_A,chr3_121050012_C_T,chr3_121047597_C_T,chr3_121074079_G_A,chr3_121071485_C_A,chr3_121072779_C_G,chr3_121070453_C_G,chr3_121071214_T_C,chr3_121080819_T_C,chr3_121081949_A_G,chr3_121082806_T_C,chr3_121074770_C_T,chr3_121097370_A_C,chr3_121097758_C_T,chr3_121090749_C_A,chr3_121086925_C_T,chr3_121085061_T_A,chr3_121041648_T_G,chr3_121019160_G_A,…	-7.24843	4.21635e-13	2.80015e-08	0.4875	0.2637
chr3:121526194-121535437	POLQ	XPEHH	14	chr3_121526194_G_A,chr3_121527838_T_C,chr3_121530469_G_C,chr3_121528267_A_G,chr3_121530631_A_T,chr3_121530667_A_G,chr3_121532174_C_T,chr3_121533513_G_A,chr3_121534066_C_T,chr3_121531864_T_C,chr3_121534102_T_C,chr3_121535437_C_T,chr3_121534898_A_G,chr3_121535051_T_C	6.8377	8.04722e-12	1.16668e-05	0.4875	0.7582
chr4:169885387-169911026	intergenic / regulatory region	XPEHH	78	chr4_169898811_C_T,chr4_169900999_A_G,chr4_169902776_T_C,chr4_169900410_A_T,chr4_169897464_T_C,chr4_169898978_C_G,chr4_169898910_G_A,chr4_169898946_G_A,chr4_169897641_A_G,chr4_169902193_C_T,chr4_169900557_C_A,chr4_169894706_G_A,chr4_169895129_A_G,chr4_169898765_C_T,chr4_169896074_C_T,chr4_169894691_C_T,chr4_169891857_A_G,chr4_169892628_T_C,chr4_169892822_C_T,chr4_169892923_T_C,chr4_169893058_G_C,…	5.99611	2.02099e-09	0.000266364	0.775	0.4231
chr5:50146113-50147148	intergenic	iHS	6	chr5_50147148_C_G,chr5_50146132_A_G,chr5_50146761_A_G,chr5_50146113_C_G,chr5_50146308_G_A,chr5_50146761_A_T	-7.75811	8.62027e-15	7.92675e-10	0.125	0.1264
chr5:145961053-146000707	SH3RF2	XPEHH	27	chr5_145997860_T_C,chr5_145997573_T_C,chr5_145996705_G_A,chr5_145996747_A_G,chr5_145996899_G_A,chr5_145997194_C_T,chr5_145997916_C_T,chr5_145998015_C_T,chr5_145998402_A_G,chr5_145998782_G_A,chr5_146000707_C_T,chr5_145994602_C_T,chr5_145992644_G_C,chr5_145992742_T_C,chr5_145991118_A_C,chr5_145991629_G_C,chr5_145991757_A_G,chr5_145992986_C_T,chr5_145993059_C_T,chr5_145993807_A_T,chr5_145972140_G_T,…	5.46417	4.65084e-08	0.00113536	0.3875	0.5824
chr7:142332043-142534017	TRBV6-2;TRBV7-1;TRBV13	iHS	8	chr7_142346017_C_T,chr7_142332043_G_T,chr7_142533048_C_T,chr7_142533105_T_C,chr7_142533188_C_G,chr7_142533297_G_T,chr7_142533841_G_A,chr7_142534017_A_G	-7.67431	1.66318e-14	1.44595e-09	0.0875	0.1099
chr8:38287902-38344429	NSD3	iHS	13	chr8_38333251_T_G,chr8_38333341_G_C,chr8_38311181_C_T,chr8_38289573_T_C,chr8_38291916_C_T,chr8_38291242_G_A,chr8_38318917_T_G,chr8_38306752_C_T,chr8_38344429_G_A,chr8_38298220_G_A,chr8_38288252_C_T,chr8_38321400_C_T,chr8_38287902_T_C	-6.55985	5.38603e-11	1.86624e-06	0.1125	0.05495
chr8:99024815-99324307	VPS13B	iHS	75	chr8_99047475_C_A,chr8_99073680_T_C,chr8_99064370_G_C,chr8_99079127_C_T,chr8_99088902_C_G,chr8_99024815_C_A,chr8_99073622_G_A,chr8_99042533_A_C,chr8_99047042_A_C,chr8_99079817_C_T,chr8_99081282_T_C,chr8_99038924_A_G,chr8_99048585_C_T,chr8_99054603_C_T,chr8_99053317_T_A,chr8_99107963_C_A,chr8_99307939_G_C,chr8_99074892_T_C,chr8_99074971_T_G,chr8_99064309_T_C,chr8_99066698_C_T,chr8_99065464_G_C,chr…	-9.71356	2.63953e-22	1.57766e-16	0.1375	0.06593
chr10:2634027-2765912	intergenic	XPEHH	73	chr10_2649985_C_T,chr10_2648022_A_G,chr10_2646513_C_T,chr10_2654239_C_A,chr10_2654879_G_A,chr10_2645918_A_G,chr10_2655242_T_C,chr10_2649384_C_T,chr10_2659094_T_A,chr10_2657722_C_T,chr10_2652370_A_G,chr10_2651795_G_T,chr10_2655001_A_G,chr10_2651212_C_T,chr10_2646621_C_T,chr10_2652205_C_T,chr10_2652672_G_A,chr10_2652864_G_A,chr10_2650464_C_T,chr10_2652587_C_T,chr10_2653958_A_G,chr10_2658123_C_T,chr…	5.89106	3.8373e-09	0.000403772	0.6	0.3187
chr10:79560079-79614571	SFTPA1;SFTPA2	iHS	33	chr10_79578380_T_G,chr10_79578097_C_G,chr10_79572517_A_G,chr10_79571038_C_G,chr10_79571636_G_A,chr10_79564423_C_T,chr10_79560383_C_G,chr10_79560079_T_C,chr10_79560702_T_C,chr10_79580890_C_T,chr10_79585950_C_T,chr10_79590884_T_C,chr10_79596469_C_G,chr10_79598133_C_T,chr10_79598481_A_G,chr10_79560413_A_T,chr10_79601201_T_C,chr10_79588670_G_A,chr10_79566919_G_A,chr10_79565016_C_T,chr10_79609151_T_C,…	-8.63201	6.02809e-18	1.46968e-12	0.1	0.07143
chr12:11063253-11104431	PRH1-PRR4	iHS	16	chr12_11104431_T_C,chr12_11103985_G_A,chr12_11103075_C_A,chr12_11103433_G_A,chr12_11082251_A_C,chr12_11066741_G_A,chr12_11081818_G_A,chr12_11064373_C_T,chr12_11081821_G_C,chr12_11063253_G_A,chr12_11063716_C_T,chr12_11066771_C_T,chr12_11081810_A_G,chr12_11064218_C_G,chr12_11085705_C_T,chr12_11067856_C_A	-8.76323	1.89736e-18	7.05938e-13	0.3	0.1923
chr12:69244518-69249012	CPSF6	XPEHH	9	chr12_69249012_C_T,chr12_69246721_C_G,chr12_69248535_C_T,chr12_69248903_A_T,chr12_69245899_A_G,chr12_69245149_A_G,chr12_69244518_T_C,chr12_69245458_T_G,chr12_69245365_C_G	5.55357	2.79899e-08	0.00094371	0.05	0.07143
chr14:69761554-69781065	SLC10A1;SRSF5	XPEHH	33	chr14_69775276_C_T,chr14_69776788_C_G,chr14_69775244_C_T,chr14_69778690_A_G,chr14_69781051_T_A,chr14_69781065_C_G,chr14_69780001_A_G,chr14_69779695_G_A,chr14_69779732_C_G,chr14_69780451_A_C,chr14_69773406_C_G,chr14_69774268_T_C,chr14_69773386_C_T,chr14_69774663_A_C,chr14_69774883_C_T,chr14_69774944_A_G,chr14_69774946_G_A,chr14_69772247_A_C,chr14_69769024_G_A,chr14_69764848_A_G,chr14_69773209_C_T,…	6.97231	3.11789e-12	9.93516e-06	0.2	0.3297
chr19:16395936-16403960	EPS15L1	XPEHH	4	chr19_16403960_A_G,chr19_16403020_G_A,chr19_16396329_A_G,chr19_16395936_C_A	5.60895	2.03561e-08	0.000843401	0.325	0.2857
chr22:35879788-35967916	RBFOX2	iHS	77	chr22_35920614_T_C,chr22_35909131_T_C,chr22_35909248_A_C,chr22_35908544_G_A,chr22_35910546_G_T,chr22_35916349_T_C,chr22_35920738_T_C,chr22_35907314_A_G,chr22_35901460_G_A,chr22_35902393_A_G,chr22_35903703_T_C,chr22_35907925_G_C,chr22_35910218_G_A,chr22_35910437_G_C,chr22_35912675_G_A,chr22_35908772_G_A,chr22_35914280_T_C,chr22_35913295_T_C,chr22_35915172_C_T,chr22_35915722_T_G,chr22_35924692_A_G,…	8.56785	1.05432e-17	2.29155e-12	0.8375	0.8022
