# Supplementary material for: Faroese whole genomes provide insight into ancestry and recent selection
Source: eLife. 2026 Jun 16;14:RP107428. doi: 10.7554/eLife.107428 (PMC13271744; doi:10.7554/eLife.107428)
Supplement: Supplementary file 5. — Region, country, approximate age, publication source, and group label for ancient ancestry samples included in the ADMIXTURE and HaploNet analyses. [file elife-107428-supp5.xlsx]

## Sheet: 5. Admixture and Ancient Ancest
sampleId	region	country	ageAverage	dataSource	groupLabel
Rathlin3	WesternEurope	Ireland	3585	Cassidy_PNAS_2016	Ireland_BronzeAge
NEO563	NorthernEurope	Denmark	3355	Allentoft_Nature_2024	Denmark_BronzeAge
NEO951	NorthernEurope	Denmark	3306	Allentoft_Nature_2024	Denmark_BronzeAge
NEO590	NorthernEurope	Denmark	3297	Allentoft_Nature_2024	Denmark_BronzeAge
NEO946	NorthernEurope	Denmark	3145	Allentoft_Nature_2024	Denmark_BronzeAge
V14	NorthernEurope	Estonia	3115	Saag_CurrentBiology_2019	Estonia_BronzeAge
X10	NorthernEurope	Estonia	3070	Saag_CurrentBiology_2019	Estonia_BronzeAge
V9	NorthernEurope	Estonia	3065	Saag_CurrentBiology_2019	Estonia_BronzeAge
X15	NorthernEurope	Estonia	3055	Saag_CurrentBiology_2019	Estonia_BronzeAge
NEO806	SouthernEurope	Italy	3013	Allentoft_Nature_2024	Italy_BronzeAge
X11	NorthernEurope	Estonia	2910	Saag_CurrentBiology_2019	Estonia_BronzeAge
0LS11	NorthernEurope	Estonia	2905	Saag_CurrentBiology_2019	Estonia_BronzeAge
cim359	CentralEasternEurope	Moldova	2873	Krzewinska_ScienceAdvances_2018	Moldova_IronAge_Cimmerian
cim358	CentralEasternEurope	Moldova	2840	Krzewinska_ScienceAdvances_2018	Moldova_IronAge_Cimmerian
R1	SouthernEurope	Italy	2834.05.00	Antonio_2019_Science	Italy_IronAge
X17	NorthernEurope	Estonia	2820	Saag_CurrentBiology_2019	Estonia_BronzeAge
X08	NorthernEurope	Estonia	2820	Saag_CurrentBiology_2019	Estonia_BronzeAge
cim357	CentralEasternEurope	Moldova	2809.05.00	Krzewinska_ScienceAdvances_2018	Moldova_IronAge_Cimmerian
R1015	SouthernEurope	Italy	2800	Antonio_2019_Science	Italy_IronAge
R1016	SouthernEurope	Italy	2750	Antonio_2019_Science	Italy_IronAge
NOR2B6	WesternEurope	France	2700	Brunel_PNAS_2020	France_IronAge_Hallstatt
NOR3-15	WesternEurope	France	2700	Brunel_PNAS_2020	France_IronAge_Hallstatt
0LS10	NorthernEurope	Estonia	2615	Saag_CurrentBiology_2019	Estonia_IronAge
R473	SouthernEurope	Italy	2600	Antonio_2019_Science	Italy_IronAge
R1021	SouthernEurope	Italy	2600	Antonio_2019_Science	Italy_IronAge
R474	SouthernEurope	Italy	2600	Antonio_2019_Science	Italy_IronAge
R475	SouthernEurope	Italy	2600	Antonio_2019_Science	Italy_IronAge
R851	SouthernEurope	Italy	2600	Antonio_2019_Science	Italy_IronAge
R850	SouthernEurope	Italy	2600	Antonio_2019_Science	Italy_IronAge
V10	NorthernEurope	Estonia	2560	Saag_CurrentBiology_2019	Estonia_IronAge
X14	NorthernEurope	Estonia	2555	Saag_CurrentBiology_2019	Estonia_BronzeAge
VII4	NorthernEurope	Estonia	2530	Saag_CurrentBiology_2019	Estonia_IronAge
MJ-41	CentralEasternEurope	Russia	2524.05.00	Jarve_CurrentBiology_2019	Russia_IronAge_Sarmatian
MJ-56	CentralEasternEurope	Russia	2513.05.00	Jarve_CurrentBiology_2019	Russia_IronAge_Sarmatian
V16	NorthernEurope	Estonia	2510	Saag_CurrentBiology_2019	Estonia_BronzeAge
NOR3-6	WesternEurope	France	2510	Brunel_PNAS_2020	France_IronAge_Hallstatt
Jeb8	WesternEurope	France	2450	Brunel_PNAS_2020	France_IronAge_Hallstatt
PECH8	WesternEurope	France	2400	Brunel_PNAS_2020	France_IronAge_LaTene
PT2	WesternEurope	France	2375	Brunel_PNAS_2020	France_IronAge_LaTene
X04	NorthernEurope	Estonia	2370	Saag_CurrentBiology_2019	Estonia_IronAge
R435	SouthernEurope	Italy	2350	Antonio_2019_Science	Italy_IronAge
LS-13	CentralEasternEurope	Russia	2308.05.00	Jarve_CurrentBiology_2019	Russia_IronAge_Sarmatian
COL153A	WesternEurope	France	2290	Brunel_PNAS_2020	France_IronAge_LaTene
COL11	WesternEurope	France	2290	Brunel_PNAS_2020	France_IronAge_LaTene
MJ-43	CentralEasternEurope	Russia	2273	Jarve_CurrentBiology_2019	Russia_IronAge_Sarmatian
scy305	CentralEasternEurope	Moldova	2254	Krzewinska_ScienceAdvances_2018	Moldova_IronAge_Scythian
scy300	CentralEasternEurope	Moldova	2253	Krzewinska_ScienceAdvances_2018	Moldova_IronAge_Scythian
NEO538	CentralEasternEurope	Russia	2250	Allentoft_Nature_2024	Russia_IronAge
scy192	CentralEasternEurope	Moldova	2250	Krzewinska_ScienceAdvances_2018	Moldova_IronAge_Scythian
scy197	CentralEasternEurope	Moldova	2250	Krzewinska_ScienceAdvances_2018	Moldova_IronAge_Scythian
PEY163	WesternEurope	France	2250	Brunel_PNAS_2020	France_IronAge_LaTene
R437	SouthernEurope	Italy	2250	Antonio_2019_Science	Italy_IronAge
scy301	CentralEasternEurope	Moldova	2247.05.00	Krzewinska_ScienceAdvances_2018	Moldova_IronAge_Scythian
scy311	CentralEasternEurope	Moldova	2246.05.00	Krzewinska_ScienceAdvances_2018	Moldova_IronAge_Scythian
V11	NorthernEurope	Estonia	2245	Saag_CurrentBiology_2019	Estonia_IronAge
scy303	CentralEasternEurope	Moldova	2241.05.00	Krzewinska_ScienceAdvances_2018	Moldova_IronAge_Scythian
ATT26	WesternEurope	France	2225	Brunel_PNAS_2020	France_IronAge_LaTene
MJ-44	CentralEasternEurope	Russia	2216.05.00	Jarve_CurrentBiology_2019	Russia_IronAge_Sarmatian
ERS86	WesternEurope	France	2200	Brunel_PNAS_2020	France_IronAge_LaTene
ERS88	WesternEurope	France	2200	Brunel_PNAS_2020	France_IronAge_LaTene
ERS1164	WesternEurope	France	2200	Brunel_PNAS_2020	France_IronAge_LaTene
BFM265	WesternEurope	France	2170	Brunel_PNAS_2020	France_IronAge_LaTene
V12	NorthernEurope	Estonia	2150	Saag_CurrentBiology_2019	Estonia_IronAge
PEY53	WesternEurope	France	2125	Brunel_PNAS_2020	France_IronAge_LaTene
BES1248	WesternEurope	France	2075	Brunel_PNAS_2020	France_IronAge_LaTene
M1489	WesternEurope	UK	2035	Martiniano_NatureCommunications_2016	Britain_IronAge
12880A	WesternEurope	UK	2017	Schiffels_NatureCommunications_2016	Britain_IronAge
12884A	WesternEurope	UK	1995	Schiffels_NatureCommunications_2016	Britain_IronAge
VII15	CentralEasternEurope	Russia	1934	Saag_CurrentBiology_2019	Russia_IronAge
DA134	CentralEasternEurope	Russia	1933	Damgaard_2018_Nature	Russia_IronAge_Sarmatian
DA139	CentralEasternEurope	Russia	1933	Damgaard_2018_Nature	Russia_IronAge_Sarmatian
DA143	CentralEasternEurope	Russia	1933	Damgaard_2018_Nature	Russia_IronAge_Sarmatian
DA144	CentralEasternEurope	Russia	1933	Damgaard_2018_Nature	Russia_IronAge_Sarmatian
DA145	CentralEasternEurope	Russia	1933	Damgaard_2018_Nature	Russia_IronAge_Sarmatian
DA141	CentralEasternEurope	Russia	1933	Damgaard_2018_Nature	Russia_IronAge_Sarmatian
VK582	NorthernEurope	Denmark	1900	Margyaran_2020_Nature	Denmark_IronAge
R42	SouthernEurope	Italy	1879	Antonio_2019_Science	Italy_Imperial
chy001	CentralEasternEurope	Russia	1878	Krzewinska_ScienceAdvances_2018	Russia_IronAge_Sarmatian
R80	SouthernEurope	Italy	1873.05.00	Antonio_2019_Science	Italy_Imperial
R39	SouthernEurope	Italy	1851	Antonio_2019_Science	Italy_Imperial
R131	SouthernEurope	Italy	1850	Antonio_2019_Science	Italy_Imperial
R113	SouthernEurope	Italy	1850	Antonio_2019_Science	Italy_Imperial
R111	SouthernEurope	Italy	1850	Antonio_2019_Science	Italy_Imperial
R116	SouthernEurope	Italy	1850	Antonio_2019_Science	Italy_Imperial
R75	SouthernEurope	Italy	1850	Antonio_2019_Science	Italy_Imperial
R115	SouthernEurope	Italy	1850	Antonio_2019_Science	Italy_Imperial
R436	SouthernEurope	Italy	1850	Antonio_2019_Science	Italy_Imperial
R78	SouthernEurope	Italy	1850	Antonio_2019_Science	Italy_Imperial
R76	SouthernEurope	Italy	1850	Antonio_2019_Science	Italy_Imperial
R81	SouthernEurope	Italy	1850	Antonio_2019_Science	Italy_Imperial
R114	SouthernEurope	Italy	1850	Antonio_2019_Science	Italy_Imperial
R1551	SouthernEurope	Italy	1817	Antonio_2019_Science	Italy_Imperial
R1549	SouthernEurope	Italy	1813.05.00	Antonio_2019_Science	Italy_Imperial
R835	SouthernEurope	Italy	1813.05.00	Antonio_2019_Science	Italy_Imperial
R836	SouthernEurope	Italy	1813.05.00	Antonio_2019_Science	Italy_Imperial
R1548	SouthernEurope	Italy	1813.05.00	Antonio_2019_Science	Italy_Imperial
R1550	SouthernEurope	Italy	1813.05.00	Antonio_2019_Science	Italy_Imperial
R1547	SouthernEurope	Italy	1813.05.00	Antonio_2019_Science	Italy_Imperial
VIII9	CentralEasternEurope	Russia	1812.05.00	Saag_CurrentBiology_2019	Russia_IronAge
chy002	CentralEasternEurope	Russia	1806	Krzewinska_ScienceAdvances_2018	Russia_IronAge_Sarmatian
VK523	NorthernEurope	Norway	1800	Margyaran_2020_Nature	Norway_IronAge
tem002	CentralEasternEurope	Russia	1790	Krzewinska_ScienceAdvances_2018	Russia_IronAge_Sarmatian
VIII5	CentralEasternEurope	Russia	1762.05.00	Saag_CurrentBiology_2019	Russia_IronAge
tem001	CentralEasternEurope	Russia	1762	Krzewinska_ScienceAdvances_2018	Russia_IronAge_Sarmatian
R123	SouthernEurope	Italy	1761.05.00	Antonio_2019_Science	Italy_Imperial
R50	SouthernEurope	Italy	1760.05.00	Antonio_2019_Science	Italy_Imperial
R125	SouthernEurope	Italy	1750	Antonio_2019_Science	Italy_Imperial
R49	SouthernEurope	Italy	1750	Antonio_2019_Science	Italy_Imperial
6DT21	WesternEurope	UK	1750	Martiniano_NatureCommunications_2016	Britain_Roman
6DT3	WesternEurope	UK	1750	Martiniano_NatureCommunications_2016	Britain_Roman
6DT23	WesternEurope	UK	1750	Martiniano_NatureCommunications_2016	Britain_Roman
6DT22	WesternEurope	UK	1750	Martiniano_NatureCommunications_2016	Britain_Roman
3DT16	WesternEurope	UK	1750	Martiniano_NatureCommunications_2016	Britain_Roman
6DT18	WesternEurope	UK	1750	Martiniano_NatureCommunications_2016	Britain_Roman
R71	SouthernEurope	Italy	1750	Antonio_2019_Science	Italy_Imperial
R72	SouthernEurope	Italy	1750	Antonio_2019_Science	Italy_Imperial
R128	SouthernEurope	Italy	1750	Antonio_2019_Science	Italy_Imperial
R69	SouthernEurope	Italy	1750	Antonio_2019_Science	Italy_Imperial
R51	SouthernEurope	Italy	1750	Antonio_2019_Science	Italy_Imperial
R73	SouthernEurope	Italy	1750	Antonio_2019_Science	Italy_Imperial
R66	SouthernEurope	Italy	1750	Antonio_2019_Science	Italy_Imperial
3DT26	WesternEurope	UK	1750	Martiniano_NatureCommunications_2016	Britain_Roman
R70	SouthernEurope	Italy	1750	Antonio_2019_Science	Italy_Imperial
R67	SouthernEurope	Italy	1750	Antonio_2019_Science	Italy_Imperial
R68	SouthernEurope	Italy	1750	Antonio_2019_Science	Italy_Imperial
R1544	SouthernEurope	Italy	1749.05.00	Antonio_2019_Science	Italy_Imperial
R37	SouthernEurope	Italy	1749.05.00	Antonio_2019_Science	Italy_Imperial
R41	SouthernEurope	Italy	1749.05.00	Antonio_2019_Science	Italy_Imperial
R38	SouthernEurope	Italy	1749.05.00	Antonio_2019_Science	Italy_Imperial
R43	SouthernEurope	Italy	1749.05.00	Antonio_2019_Science	Italy_Imperial
R44	SouthernEurope	Italy	1749.05.00	Antonio_2019_Science	Italy_Imperial
R1545	SouthernEurope	Italy	1749.05.00	Antonio_2019_Science	Italy_Imperial
R45	SouthernEurope	Italy	1749.05.00	Antonio_2019_Science	Italy_Imperial
R40	SouthernEurope	Italy	1749.05.00	Antonio_2019_Science	Italy_Imperial
R1543	SouthernEurope	Italy	1749.05.00	Antonio_2019_Science	Italy_Imperial
DA234	NorthernEurope	Finland	1745.05.00	Sikora_Nature_2019	Finland_IronAge_Saami
15579A	WesternEurope	UK	1745	Schiffels_NatureCommunications_2016	Britain_IronAge
tem003	CentralEasternEurope	Russia	1724.05.00	Krzewinska_ScienceAdvances_2018	Russia_IronAge_Sarmatian
R132	SouthernEurope	Italy	1719	Antonio_2019_Science	Italy_Imperial
DA162	CentralEasternEurope	Russia	1700	Damgaard_2018_Nature	Russia_IronAge_Alan
R47	SouthernEurope	Italy	1667.05.00	Antonio_2019_Science	Italy_Imperial
R126	SouthernEurope	Italy	1663	Antonio_2019_Science	Italy_Imperial
FN2	WesternEurope	Germany	1650	Veeramah_PNAS_2018	Germany_Roman
VK579	NorthernEurope	Sweden	1650	Margyaran_2020_Nature	Sweden_IronAge
VK521	NorthernEurope	Denmark	1650	Margyaran_2020_Nature	Denmark_IronAge
R31	SouthernEurope	Italy	1574.05.00	Antonio_2019_Science	Italy_LateAntiquity
VK522	NorthernEurope	Sweden	1564	Margyaran_2020_Nature	Sweden_IronAge
R136	SouthernEurope	Italy	1550	Antonio_2019_Science	Italy_LateAntiquity
R130	SouthernEurope	Italy	1550	Antonio_2019_Science	Italy_LateAntiquity
R133	SouthernEurope	Italy	1550	Antonio_2019_Science	Italy_LateAntiquity
R137	SouthernEurope	Italy	1550	Antonio_2019_Science	Italy_LateAntiquity
R134	SouthernEurope	Italy	1550	Antonio_2019_Science	Italy_LateAntiquity
DA243	CentralEasternEurope	Russia	1533	Damgaard_2018_Nature	Russia_IronAge_Alan
DA236	NorthernEurope	Finland	1508	Sikora_Nature_2019	Finland_IronAge
Alh1	WesternEurope	Germany	1500	Veeramah_PNAS_2018	Germany_Medieval
VK418	NorthernEurope	Norway	1500	Margyaran_2020_Nature	Norway_IronAge
VK213	NorthernEurope	Denmark	1491	Margyaran_2020_Nature	Denmark_IronAge
NW54	WesternEurope	Germany	1490.05.00	Veeramah_PNAS_2018	Germany_Medieval
15569A	WesternEurope	UK	1490	Schiffels_NatureCommunications_2016	Britain_Medieval_Saxon
Alh10	WesternEurope	Germany	1489	Veeramah_PNAS_2018	Germany_Medieval
15570A	WesternEurope	UK	1482.05.00	Schiffels_NatureCommunications_2016	Britain_Medieval_Saxon
15577A	WesternEurope	UK	1477.05.00	Schiffels_NatureCommunications_2016	Britain_Medieval_Saxon
STR486	WesternEurope	Germany	1455	Veeramah_PNAS_2018	Germany_Medieval
15558A	WesternEurope	UK	1455	Schiffels_NatureCommunications_2016	Britain_Medieval_Saxon
R106	SouthernEurope	Italy	1450	Antonio_2019_Science	Italy_LateAntiquity
R33	SouthernEurope	Italy	1450	Antonio_2019_Science	Italy_LateAntiquity
R36	SouthernEurope	Italy	1450	Antonio_2019_Science	Italy_LateAntiquity
R107	SouthernEurope	Italy	1450	Antonio_2019_Science	Italy_LateAntiquity
R121	SouthernEurope	Italy	1450	Antonio_2019_Science	Italy_LateAntiquity
R122	SouthernEurope	Italy	1450	Antonio_2019_Science	Italy_LateAntiquity
R105	SouthernEurope	Italy	1450	Antonio_2019_Science	Italy_LateAntiquity
R118	SouthernEurope	Italy	1450	Antonio_2019_Science	Italy_LateAntiquity
R109	SouthernEurope	Italy	1450	Antonio_2019_Science	Italy_LateAntiquity
R110	SouthernEurope	Italy	1450	Antonio_2019_Science	Italy_LateAntiquity
R108	SouthernEurope	Italy	1450	Antonio_2019_Science	Italy_LateAntiquity
R117	SouthernEurope	Italy	1450	Antonio_2019_Science	Italy_LateAntiquity
R120	SouthernEurope	Italy	1450	Antonio_2019_Science	Italy_LateAntiquity
R35	SouthernEurope	Italy	1450	Antonio_2019_Science	Italy_LateAntiquity
R32	SouthernEurope	Italy	1450	Antonio_2019_Science	Italy_LateAntiquity
R30	SouthernEurope	Italy	1450	Antonio_2019_Science	Italy_LateAntiquity
R34	SouthernEurope	Italy	1450	Antonio_2019_Science	Italy_LateAntiquity
STR220c	WesternEurope	Germany	1445	Veeramah_PNAS_2018	Germany_Medieval
RISE174	NorthernEurope	Sweden	1431	Allentoft_Nature_2015	Sweden_IronAge
STR310	WesternEurope	Germany	1430	Veeramah_PNAS_2018	Germany_Medieval
STR300b	WesternEurope	Germany	1430	Veeramah_PNAS_2018	Germany_Medieval
DA238	NorthernEurope	Finland	1417	Sikora_Nature_2019	Finland_IronAge_Saami
VK390	NorthernEurope	Norway	1350	Margyaran_2020_Nature	Norway_IronAge
VK391	NorthernEurope	Norway	1350	Margyaran_2020_Nature	Norway_IronAge
DA160	CentralEasternEurope	Russia	1300	Damgaard_2018_Nature	Russia_IronAge_Alan
DA146	CentralEasternEurope	Russia	1300	Damgaard_2018_Nature	Russia_IronAge_Alan
12883A	WesternEurope	UK	1246.05.00	Schiffels_NatureCommunications_2016	Britain_Medieval_Saxon
12881A	WesternEurope	UK	1232	Schiffels_NatureCommunications_2016	Britain_Medieval_Saxon
VK296	NorthernEurope	Denmark	1230	Margyaran_2020_Nature	Denmark_VikingAge
VK297	NorthernEurope	Denmark	1200	Margyaran_2020_Nature	Denmark_VikingAge
VK70	NorthernEurope	Denmark	1200	Margyaran_2020_Nature	Denmark_VikingAge
VK69	NorthernEurope	Denmark	1200	Margyaran_2020_Nature	Denmark_VikingAge
VK71	NorthernEurope	Denmark	1200	Margyaran_2020_Nature	Denmark_VikingAge
VK65	NorthernEurope	Denmark	1200	Margyaran_2020_Nature	Denmark_VikingAge
VK301	NorthernEurope	Denmark	1185	Margyaran_2020_Nature	Denmark_VikingAge
VK545	WesternEurope	Ireland	1185	Margyaran_2020_Nature	Ireland_Medieval
NO3423	WesternEurope	UK	1170	Martiniano_NatureCommunications_2016	Britain_Medieval_Saxon
12885A	WesternEurope	UK	1164.05.00	Schiffels_NatureCommunications_2016	Britain_Medieval_Saxon
VK329	NorthernEurope	Denmark	1163	Margyaran_2020_Nature	Denmark_VikingAge
VK350	NorthernEurope	Sweden	1151	Margyaran_2020_Nature	Sweden_VikingAge
VK319	NorthernEurope	Denmark	1150	Margyaran_2020_Nature	Denmark_VikingAge
VK349	NorthernEurope	Sweden	1121	Margyaran_2020_Nature	Sweden_VikingAge
VK355	NorthernEurope	Sweden	1102	Margyaran_2020_Nature	Sweden_VikingAge
VK444	NorthernEurope	Sweden	1102	Margyaran_2020_Nature	Sweden_VikingAge
VK442	NorthernEurope	Sweden	1102	Margyaran_2020_Nature	Sweden_VikingAge
VK419	NorthernEurope	Norway	1100	Margyaran_2020_Nature	Norway_VikingAge
VK514	NorthernEurope	Norway	1100	Margyaran_2020_Nature	Norway_VikingAge
VK552	NorthernEurope	Estonia	1100	Margyaran_2020_Nature	Estonia_VikingAge
VK512	NorthernEurope	Estonia	1100	Margyaran_2020_Nature	Estonia_VikingAge
VK549	NorthernEurope	Estonia	1100	Margyaran_2020_Nature	Estonia_VikingAge
VK553	NorthernEurope	Estonia	1100	Margyaran_2020_Nature	Estonia_VikingAge
VK509	NorthernEurope	Estonia	1100	Margyaran_2020_Nature	Estonia_VikingAge
VK480	NorthernEurope	Estonia	1100	Margyaran_2020_Nature	Estonia_VikingAge
VK489	NorthernEurope	Estonia	1100	Margyaran_2020_Nature	Estonia_VikingAge
VK493	NorthernEurope	Estonia	1100	Margyaran_2020_Nature	Estonia_VikingAge
VK483	NorthernEurope	Estonia	1100	Margyaran_2020_Nature	Estonia_VikingAge
VK481	NorthernEurope	Estonia	1100	Margyaran_2020_Nature	Estonia_VikingAge
VK496	NorthernEurope	Estonia	1100	Margyaran_2020_Nature	Estonia_VikingAge
VK506	NorthernEurope	Estonia	1100	Margyaran_2020_Nature	Estonia_VikingAge
VK507	NorthernEurope	Estonia	1100	Margyaran_2020_Nature	Estonia_VikingAge
VK482	NorthernEurope	Estonia	1100	Margyaran_2020_Nature	Estonia_VikingAge
VK551	NorthernEurope	Estonia	1100	Margyaran_2020_Nature	Estonia_VikingAge
VK505	NorthernEurope	Estonia	1100	Margyaran_2020_Nature	Estonia_VikingAge
VK486	NorthernEurope	Estonia	1100	Margyaran_2020_Nature	Estonia_VikingAge
VK484	NorthernEurope	Estonia	1100	Margyaran_2020_Nature	Estonia_VikingAge
VK554	NorthernEurope	Estonia	1100	Margyaran_2020_Nature	Estonia_VikingAge
VK555	NorthernEurope	Estonia	1100	Margyaran_2020_Nature	Estonia_VikingAge
VK491	NorthernEurope	Estonia	1100	Margyaran_2020_Nature	Estonia_VikingAge
VK492	NorthernEurope	Estonia	1100	Margyaran_2020_Nature	Estonia_VikingAge
VK510	NorthernEurope	Estonia	1100	Margyaran_2020_Nature	Estonia_VikingAge
VK495	NorthernEurope	Estonia	1100	Margyaran_2020_Nature	Estonia_VikingAge
VK504	NorthernEurope	Estonia	1100	Margyaran_2020_Nature	Estonia_VikingAge
VK498	NorthernEurope	Estonia	1100	Margyaran_2020_Nature	Estonia_VikingAge
VK488	NorthernEurope	Estonia	1100	Margyaran_2020_Nature	Estonia_VikingAge
VK508	NorthernEurope	Estonia	1100	Margyaran_2020_Nature	Estonia_VikingAge
VK550	NorthernEurope	Estonia	1100	Margyaran_2020_Nature	Estonia_VikingAge
VK511	NorthernEurope	Estonia	1100	Margyaran_2020_Nature	Estonia_VikingAge
VK487	NorthernEurope	Estonia	1100	Margyaran_2020_Nature	Estonia_VikingAge
VK519	NorthernEurope	Norway	1100	Margyaran_2020_Nature	Norway_VikingAge
VK358	NorthernEurope	Sweden	1097	Margyaran_2020_Nature	Sweden_VikingAge
VK336	NorthernEurope	Sweden	1097	Margyaran_2020_Nature	Sweden_VikingAge
VK332	NorthernEurope	Sweden	1092	Margyaran_2020_Nature	Sweden_VikingAge
VK337	NorthernEurope	Sweden	1092	Margyaran_2020_Nature	Sweden_VikingAge
VK325	NorthernEurope	Denmark	1091	Margyaran_2020_Nature	Denmark_VikingAge
R1283	SouthernEurope	Italy	1091	Antonio_2019_Science	Italy_Medieval
VK328	NorthernEurope	Denmark	1079	Margyaran_2020_Nature	Denmark_VikingAge
VK84	NorthernEurope	Denmark	1075	Margyaran_2020_Nature	Denmark_VikingAge
VK87	NorthernEurope	Denmark	1075	Margyaran_2020_Nature	Denmark_VikingAge
VK385	NorthernEurope	Denmark	1075	Margyaran_2020_Nature	Denmark_VikingAge
VK384	NorthernEurope	Denmark	1075	Margyaran_2020_Nature	Denmark_VikingAge
VK300	NorthernEurope	Denmark	1075	Margyaran_2020_Nature	Denmark_VikingAge
VK92	NorthernEurope	Denmark	1075	Margyaran_2020_Nature	Denmark_VikingAge
VK312	NorthernEurope	Denmark	1075	Margyaran_2020_Nature	Denmark_VikingAge
VK369	NorthernEurope	Denmark	1075	Margyaran_2020_Nature	Denmark_VikingAge
VK294	NorthernEurope	Denmark	1075	Margyaran_2020_Nature	Denmark_VikingAge
VK315	NorthernEurope	Denmark	1075	Margyaran_2020_Nature	Denmark_VikingAge
VK313	NorthernEurope	Denmark	1075	Margyaran_2020_Nature	Denmark_VikingAge
VK340	NorthernEurope	Denmark	1075	Margyaran_2020_Nature	Denmark_VikingAge
VK90	NorthernEurope	Denmark	1075	Margyaran_2020_Nature	Denmark_VikingAge
VK314	NorthernEurope	Denmark	1075	Margyaran_2020_Nature	Denmark_VikingAge
VK333	NorthernEurope	Sweden	1065	Margyaran_2020_Nature	Sweden_VikingAge
VK371	NorthernEurope	Denmark	1065	Margyaran_2020_Nature	Denmark_VikingAge
stg026	NorthernEurope	Sweden	1053.05.00	Krzewinska_CurrentBiology_2018	Sweden_VikingAge
VK529	NorthernEurope	Norway	1050	Margyaran_2020_Nature	Norway_VikingAge
VK528	NorthernEurope	Norway	1050	Margyaran_2020_Nature	Norway_VikingAge
R60	SouthernEurope	Italy	1045	Antonio_2019_Science	Italy_Medieval
R59	SouthernEurope	Italy	1045	Antonio_2019_Science	Italy_Medieval
VK221	CentralEasternEurope	Russia	1039	Margyaran_2020_Nature	Russia_VikingAge
SSJ-A-2	NorthernEurope	Iceland	1025	Ebenesersdottir_Science_2018	Iceland_VikingAge
DKS-A-1	NorthernEurope	Iceland	1025	Ebenesersdottir_Science_2018	Iceland_VikingAge
SSG-A-3	NorthernEurope	Iceland	1025	Ebenesersdottir_Science_2018	Iceland_VikingAge
SSG-A-4	NorthernEurope	Iceland	1025	Ebenesersdottir_Science_2018	Iceland_VikingAge
SSG-A-2	NorthernEurope	Iceland	1025	Ebenesersdottir_Science_2018	Iceland_VikingAge
FSS-A-1	NorthernEurope	Iceland	1015	Ebenesersdottir_Science_2018	Iceland_VikingAge
HSJ-A-1	NorthernEurope	Iceland	1015	Ebenesersdottir_Science_2018	Iceland_VikingAge
SVK-A-1	NorthernEurope	Iceland	1015	Ebenesersdottir_Science_2018	Iceland_VikingAge
NNM-A-1	NorthernEurope	Iceland	1015	Ebenesersdottir_Science_2018	Iceland_VikingAge
YGS-B-2	NorthernEurope	Iceland	1015	Ebenesersdottir_Science_2018	Iceland_VikingAge
GTE-A-1	NorthernEurope	Iceland	1015	Ebenesersdottir_Science_2018	Iceland_VikingAge
GRS-A-1	NorthernEurope	Iceland	1015	Ebenesersdottir_Science_2018	Iceland_VikingAge
MKR-A-1	NorthernEurope	Iceland	1015	Ebenesersdottir_Science_2018	Iceland_VikingAge
SBT-A-1	NorthernEurope	Iceland	1015	Ebenesersdottir_Science_2018	Iceland_VikingAge
VK144	WesternEurope	UK	1010	Margyaran_2020_Nature	Britain_VikingAge
VK177	WesternEurope	UK	1010	Margyaran_2020_Nature	Britain_VikingAge
VK178	WesternEurope	UK	1010	Margyaran_2020_Nature	Britain_VikingAge
VK150	WesternEurope	UK	1010	Margyaran_2020_Nature	Britain_VikingAge
VK173	WesternEurope	UK	1010	Margyaran_2020_Nature	Britain_VikingAge
VK166	WesternEurope	UK	1010	Margyaran_2020_Nature	Britain_VikingAge
VK143	WesternEurope	UK	1010	Margyaran_2020_Nature	Britain_VikingAge
VK147	WesternEurope	UK	1010	Margyaran_2020_Nature	Britain_VikingAge
VK172	WesternEurope	UK	1010	Margyaran_2020_Nature	Britain_VikingAge
VK168	WesternEurope	UK	1010	Margyaran_2020_Nature	Britain_VikingAge
VK165	WesternEurope	UK	1010	Margyaran_2020_Nature	Britain_VikingAge
VK175	WesternEurope	UK	1010	Margyaran_2020_Nature	Britain_VikingAge
VK145	WesternEurope	UK	1010	Margyaran_2020_Nature	Britain_VikingAge
VK174	WesternEurope	UK	1010	Margyaran_2020_Nature	Britain_VikingAge
VK167	WesternEurope	UK	1010	Margyaran_2020_Nature	Britain_VikingAge
VK176	WesternEurope	UK	1010	Margyaran_2020_Nature	Britain_VikingAge
VK151	WesternEurope	UK	1010	Margyaran_2020_Nature	Britain_VikingAge
VK146	WesternEurope	UK	1010	Margyaran_2020_Nature	Britain_VikingAge
VK518	NorthernEurope	Norway	1000	Margyaran_2020_Nature	Norway_VikingAge
VDP-A-6	NorthernEurope	Iceland	1000	Ebenesersdottir_Science_2018	Iceland_VikingAge
VK526	NorthernEurope	Norway	1000	Margyaran_2020_Nature	Norway_VikingAge
VK544	WesternEurope	Ireland	1000	Margyaran_2020_Nature	Ireland_Medieval
VK543	WesternEurope	Ireland	1000	Margyaran_2020_Nature	Ireland_Medieval
VK548	NorthernEurope	Norway	1000	Margyaran_2020_Nature	Norway_VikingAge
VK392	NorthernEurope	Norway	1000	Margyaran_2020_Nature	Norway_VikingAge
VDP-A-7	NorthernEurope	Iceland	1000	Ebenesersdottir_Science_2018	Iceland_VikingAge
VK417	NorthernEurope	Norway	1000	Margyaran_2020_Nature	Norway_VikingAge
VDP-A-5	NorthernEurope	Iceland	1000	Ebenesersdottir_Science_2018	Iceland_VikingAge
VK291	NorthernEurope	Denmark	1000	Margyaran_2020_Nature	Denmark_VikingAge
VK289	NorthernEurope	Denmark	1000	Margyaran_2020_Nature	Denmark_VikingAge
VK525	NorthernEurope	Norway	1000	Margyaran_2020_Nature	Norway_VikingAge
STT-A-2	NorthernEurope	Iceland	1000	Ebenesersdottir_Science_2018	Iceland_VikingAge
DAV-A-8	NorthernEurope	Iceland	1000	Ebenesersdottir_Science_2018	Iceland_VikingAge
grt035	NorthernEurope	Sweden	995.05.00	Krzewinska_CurrentBiology_2018	Sweden_VikingAge
TGS-A-1	NorthernEurope	Iceland	989.05.00	Ebenesersdottir_Science_2018	Iceland_VikingAge
84001	NorthernEurope	Sweden	988.05.00	Krzewinska_CurrentBiology_2018	Sweden_VikingAge
VK453	NorthernEurope	Sweden	975	Margyaran_2020_Nature	Sweden_VikingAge
VK232	NorthernEurope	Sweden	975	Margyaran_2020_Nature	Sweden_VikingAge
VK58	NorthernEurope	Sweden	975	Margyaran_2020_Nature	Sweden_VikingAge
VK468	NorthernEurope	Sweden	975	Margyaran_2020_Nature	Sweden_VikingAge
VK429	NorthernEurope	Sweden	975	Margyaran_2020_Nature	Sweden_VikingAge
VK477	NorthernEurope	Sweden	975	Margyaran_2020_Nature	Sweden_VikingAge
VK428	NorthernEurope	Sweden	975	Margyaran_2020_Nature	Sweden_VikingAge
VK431	NorthernEurope	Sweden	975	Margyaran_2020_Nature	Sweden_VikingAge
VK48	NorthernEurope	Sweden	975	Margyaran_2020_Nature	Sweden_VikingAge
VK430	NorthernEurope	Sweden	975	Margyaran_2020_Nature	Sweden_VikingAge
VK469	NorthernEurope	Sweden	975	Margyaran_2020_Nature	Sweden_VikingAge
VK433	NorthernEurope	Sweden	975	Margyaran_2020_Nature	Sweden_VikingAge
VK460	NorthernEurope	Sweden	975	Margyaran_2020_Nature	Sweden_VikingAge
VK479	NorthernEurope	Sweden	975	Margyaran_2020_Nature	Sweden_VikingAge
VK455	NorthernEurope	Sweden	975	Margyaran_2020_Nature	Sweden_VikingAge
VK454	NorthernEurope	Sweden	975	Margyaran_2020_Nature	Sweden_VikingAge
VK459	NorthernEurope	Sweden	975	Margyaran_2020_Nature	Sweden_VikingAge
VK53	NorthernEurope	Sweden	975	Margyaran_2020_Nature	Sweden_VikingAge
VK64	NorthernEurope	Sweden	975	Margyaran_2020_Nature	Sweden_VikingAge
VK473	NorthernEurope	Sweden	975	Margyaran_2020_Nature	Sweden_VikingAge
VK474	NorthernEurope	Sweden	975	Margyaran_2020_Nature	Sweden_VikingAge
VK50	NorthernEurope	Sweden	975	Margyaran_2020_Nature	Sweden_VikingAge
VK60	NorthernEurope	Sweden	975	Margyaran_2020_Nature	Sweden_VikingAge
VK56	NorthernEurope	Sweden	975	Margyaran_2020_Nature	Sweden_VikingAge
VK461	NorthernEurope	Sweden	975	Margyaran_2020_Nature	Sweden_VikingAge
VK452	NorthernEurope	Sweden	975	Margyaran_2020_Nature	Sweden_VikingAge
VK434	NorthernEurope	Sweden	975	Margyaran_2020_Nature	Sweden_VikingAge
VK432	NorthernEurope	Sweden	975	Margyaran_2020_Nature	Sweden_VikingAge
VK463	NorthernEurope	Sweden	975	Margyaran_2020_Nature	Sweden_VikingAge
VK51	NorthernEurope	Sweden	975	Margyaran_2020_Nature	Sweden_VikingAge
VK471	NorthernEurope	Sweden	975	Margyaran_2020_Nature	Sweden_VikingAge
VK478	NorthernEurope	Sweden	975	Margyaran_2020_Nature	Sweden_VikingAge
VK475	NorthernEurope	Sweden	975	Margyaran_2020_Nature	Sweden_VikingAge
VK439	NorthernEurope	Sweden	975	Margyaran_2020_Nature	Sweden_VikingAge
VK458	NorthernEurope	Sweden	975	Margyaran_2020_Nature	Sweden_VikingAge
VK438	NorthernEurope	Sweden	975	Margyaran_2020_Nature	Sweden_VikingAge
VK457	NorthernEurope	Sweden	975	Margyaran_2020_Nature	Sweden_VikingAge
VK476	NorthernEurope	Sweden	975	Margyaran_2020_Nature	Sweden_VikingAge
VK450	NorthernEurope	Sweden	975	Margyaran_2020_Nature	Sweden_VikingAge
VK57	NorthernEurope	Sweden	975	Margyaran_2020_Nature	Sweden_VikingAge
VK63	NorthernEurope	Sweden	975	Margyaran_2020_Nature	Sweden_VikingAge
VK456	NorthernEurope	Sweden	975	Margyaran_2020_Nature	Sweden_VikingAge
VK354	NorthernEurope	Sweden	964	Margyaran_2020_Nature	Sweden_VikingAge
R63	SouthernEurope	Italy	960	Antonio_2019_Science	Italy_Medieval
VK219	CentralEasternEurope	Russia	958	Margyaran_2020_Nature	Russia_VikingAge
VK326	NorthernEurope	Denmark	958	Margyaran_2020_Nature	Denmark_VikingAge
VK256	WesternEurope	UK	953	Margyaran_2020_Nature	Britain_VikingAge
VK263	WesternEurope	UK	953	Margyaran_2020_Nature	Britain_VikingAge
VK262	WesternEurope	UK	953	Margyaran_2020_Nature	Britain_VikingAge
VK261	WesternEurope	UK	953	Margyaran_2020_Nature	Britain_VikingAge
VK257	WesternEurope	UK	953	Margyaran_2020_Nature	Britain_VikingAge
VK260	WesternEurope	UK	953	Margyaran_2020_Nature	Britain_VikingAge
VK264	WesternEurope	UK	953	Margyaran_2020_Nature	Britain_VikingAge
VK449	WesternEurope	UK	953	Margyaran_2020_Nature	Britain_VikingAge
VK258	WesternEurope	UK	953	Margyaran_2020_Nature	Britain_VikingAge
VK259	WesternEurope	UK	953	Margyaran_2020_Nature	Britain_VikingAge
VK420	NorthernEurope	Norway	950	Margyaran_2020_Nature	Norway_VikingAge
VK448	NorthernEurope	Norway	950	Margyaran_2020_Nature	Norway_VikingAge
VK415	NorthernEurope	Norway	950	Margyaran_2020_Nature	Norway_VikingAge
VK170	WesternEurope	UK	950	Margyaran_2020_Nature	Britain_VikingAge
VK547	NorthernEurope	Norway	950	Margyaran_2020_Nature	Norway_VikingAge
VK532	NorthernEurope	Denmark	950	Margyaran_2020_Nature	Denmark_IronAge
KNS-A-1	NorthernEurope	Iceland	950	Ebenesersdottir_Science_2018	Iceland_VikingAge
DAV-A-9	NorthernEurope	Iceland	950	Ebenesersdottir_Science_2018	Iceland_VikingAge
R1285	SouthernEurope	Italy	945.05.00	Antonio_2019_Science	Italy_Medieval
VK327	NorthernEurope	Denmark	945	Margyaran_2020_Nature	Denmark_VikingAge
VK324	NorthernEurope	Denmark	938	Margyaran_2020_Nature	Denmark_VikingAge
stg021	NorthernEurope	Sweden	924	Krzewinska_CurrentBiology_2018	Sweden_VikingAge
VK186	NorthernEurope	Greenland	903	Margyaran_2020_Nature	Greenland_VikingAge
VK353	NorthernEurope	Sweden	901	Margyaran_2020_Nature	Sweden_VikingAge
VK334	NorthernEurope	Sweden	901	Margyaran_2020_Nature	Sweden_VikingAge
VK279	NorthernEurope	Denmark	900	Margyaran_2020_Nature	Denmark_VikingAge
VK138	NorthernEurope	Denmark	900	Margyaran_2020_Nature	Denmark_VikingAge
VK205	WesternEurope	UK	900	Margyaran_2020_Nature	Britain_VikingAge
VK368	NorthernEurope	Denmark	900	Margyaran_2020_Nature	Denmark_VikingAge
VK422	NorthernEurope	Norway	900	Margyaran_2020_Nature	Norway_VikingAge
VK316	NorthernEurope	Denmark	900	Margyaran_2020_Nature	Denmark_VikingAge
VK338	NorthernEurope	Denmark	900	Margyaran_2020_Nature	Denmark_VikingAge
VK363	NorthernEurope	Denmark	900	Margyaran_2020_Nature	Denmark_VikingAge
VK335	NorthernEurope	Sweden	900	Margyaran_2020_Nature	Sweden_VikingAge
VK275	NorthernEurope	Denmark	900	Margyaran_2020_Nature	Denmark_VikingAge
VK278	NorthernEurope	Denmark	900	Margyaran_2020_Nature	Denmark_VikingAge
VK361	NorthernEurope	Denmark	900	Margyaran_2020_Nature	Denmark_VikingAge
VK317	NorthernEurope	Denmark	900	Margyaran_2020_Nature	Denmark_VikingAge
VK366	NorthernEurope	Denmark	900	Margyaran_2020_Nature	Denmark_VikingAge
VK345	NorthernEurope	Sweden	900	Margyaran_2020_Nature	Sweden_VikingAge
VK129	NorthernEurope	Iceland	900	Margyaran_2020_Nature	Iceland_VikingAge
VK127	NorthernEurope	Iceland	900	Margyaran_2020_Nature	Iceland_VikingAge
VK394	NorthernEurope	Norway	900	Margyaran_2020_Nature	Norway_VikingAge
VK372	NorthernEurope	Denmark	900	Margyaran_2020_Nature	Denmark_VikingAge
VK515	NorthernEurope	Norway	900	Margyaran_2020_Nature	Norway_VikingAge
VK204	WesternEurope	UK	900	Margyaran_2020_Nature	Britain_VikingAge
VK524	NorthernEurope	Norway	900	Margyaran_2020_Nature	Norway_VikingAge
VK389	NorthernEurope	Norway	900	Margyaran_2020_Nature	Norway_VikingAge
VK128	NorthernEurope	Iceland	900	Margyaran_2020_Nature	Iceland_VikingAge
VK445	NorthernEurope	Denmark	900	Margyaran_2020_Nature	Denmark_VikingAge
VK393	NorthernEurope	Norway	900	Margyaran_2020_Nature	Norway_VikingAge
VK516	NorthernEurope	Norway	900	Margyaran_2020_Nature	Norway_VikingAge
VK520	NorthernEurope	Norway	900	Margyaran_2020_Nature	Norway_VikingAge
VK290	NorthernEurope	Denmark	900	Margyaran_2020_Nature	Denmark_VikingAge
VK320	NorthernEurope	Denmark	900	Margyaran_2020_Nature	Denmark_VikingAge
VK370	NorthernEurope	Denmark	900	Margyaran_2020_Nature	Denmark_VikingAge
VK141	NorthernEurope	Denmark	900	Margyaran_2020_Nature	Denmark_VikingAge
VK288	NorthernEurope	Denmark	900	Margyaran_2020_Nature	Denmark_VikingAge
VK295	NorthernEurope	Denmark	900	Margyaran_2020_Nature	Denmark_VikingAge
VK281	NorthernEurope	Denmark	900	Margyaran_2020_Nature	Denmark_VikingAge
VK344	NorthernEurope	Sweden	900	Margyaran_2020_Nature	Sweden_VikingAge
VK346	NorthernEurope	Sweden	900	Margyaran_2020_Nature	Sweden_VikingAge
VK266	NorthernEurope	Sweden	900	Margyaran_2020_Nature	Sweden_VikingAge
VK280	NorthernEurope	Denmark	900	Margyaran_2020_Nature	Denmark_VikingAge
VK284	NorthernEurope	Denmark	900	Margyaran_2020_Nature	Denmark_VikingAge
VK285	NorthernEurope	Denmark	900	Margyaran_2020_Nature	Denmark_VikingAge
VK446	NorthernEurope	Denmark	900	Margyaran_2020_Nature	Denmark_VikingAge
VK323	NorthernEurope	Denmark	900	Margyaran_2020_Nature	Denmark_VikingAge
VK298	NorthernEurope	Denmark	900	Margyaran_2020_Nature	Denmark_VikingAge
VK364	NorthernEurope	Denmark	900	Margyaran_2020_Nature	Denmark_VikingAge
VK373	NorthernEurope	Denmark	900	Margyaran_2020_Nature	Denmark_VikingAge
VK139	NorthernEurope	Denmark	900	Margyaran_2020_Nature	Denmark_VikingAge
VK443	NorthernEurope	Sweden	900	Margyaran_2020_Nature	Sweden_VikingAge
VK362	NorthernEurope	Denmark	900	Margyaran_2020_Nature	Denmark_VikingAge
VK287	NorthernEurope	Denmark	900	Margyaran_2020_Nature	Denmark_VikingAge
VK274	NorthernEurope	Denmark	900	Margyaran_2020_Nature	Denmark_VikingAge
VK348	NorthernEurope	Sweden	900	Margyaran_2020_Nature	Sweden_VikingAge
VK352	NorthernEurope	Sweden	900	Margyaran_2020_Nature	Sweden_VikingAge
gtm021	NorthernEurope	Sweden	900	Krzewinska_CurrentBiology_2018	Sweden_VikingAge
84005	NorthernEurope	Sweden	900	Krzewinska_CurrentBiology_2018	Sweden_VikingAge
VK533	NorthernEurope	Sweden	900	Margyaran_2020_Nature	Sweden_VikingAge
VK367	NorthernEurope	Denmark	900	Margyaran_2020_Nature	Denmark_VikingAge
kal009	NorthernEurope	Sweden	900	Krzewinska_CurrentBiology_2018	Sweden_VikingAge
kal006	NorthernEurope	Sweden	900	Krzewinska_CurrentBiology_2018	Sweden_VikingAge
stg020	NorthernEurope	Sweden	900	Krzewinska_CurrentBiology_2018	Sweden_VikingAge
97002	NorthernEurope	Sweden	900	Krzewinska_CurrentBiology_2018	Sweden_VikingAge
VK282	NorthernEurope	Denmark	900	Margyaran_2020_Nature	Denmark_VikingAge
nuf002	NorthernEurope	Sweden	900	Krzewinska_CurrentBiology_2018	Sweden_VikingAge
VK380	NorthernEurope	Sweden	900	Margyaran_2020_Nature	Sweden_VikingAge
VK268	NorthernEurope	Sweden	900	Margyaran_2020_Nature	Sweden_VikingAge
kls001	NorthernEurope	Sweden	900	Krzewinska_CurrentBiology_2018	Sweden_VikingAge
VK94	NorthernEurope	Denmark	900	Margyaran_2020_Nature	Denmark_VikingAge
VK292	NorthernEurope	Denmark	900	Margyaran_2020_Nature	Denmark_VikingAge
VK276	NorthernEurope	Denmark	900	Margyaran_2020_Nature	Denmark_VikingAge
VK286	NorthernEurope	Denmark	900	Margyaran_2020_Nature	Denmark_VikingAge
VK202	WesternEurope	UK	900	Margyaran_2020_Nature	Britain_VikingAge
VK207	WesternEurope	UK	900	Margyaran_2020_Nature	Britain_VikingAge
VK386	NorthernEurope	Norway	900	Margyaran_2020_Nature	Norway_VikingAge
VK530	NorthernEurope	Norway	900	Margyaran_2020_Nature	Norway_VikingAge
VK203	WesternEurope	UK	900	Margyaran_2020_Nature	Britain_VikingAge
VK201	WesternEurope	UK	900	Margyaran_2020_Nature	Britain_VikingAge
VK365	NorthernEurope	Denmark	900	Margyaran_2020_Nature	Denmark_VikingAge
VK265	NorthernEurope	Sweden	900	Margyaran_2020_Nature	Sweden_VikingAge
VK134	NorthernEurope	Denmark	900	Margyaran_2020_Nature	Denmark_VikingAge
VK343	NorthernEurope	Sweden	900	Margyaran_2020_Nature	Sweden_VikingAge
VK342	NorthernEurope	Sweden	900	Margyaran_2020_Nature	Sweden_VikingAge
VK357	NorthernEurope	Sweden	897	Margyaran_2020_Nature	Sweden_VikingAge
VK212	CentralEasternEurope	Poland	889	Margyaran_2020_Nature	Poland_VikingAge
VK20	CentralEasternEurope	Russia	888	Margyaran_2020_Nature	Russia_VikingAge
grt036	NorthernEurope	Sweden	877.05.00	Krzewinska_CurrentBiology_2018	Sweden_VikingAge
urm035	NorthernEurope	Sweden	874	Krzewinska_CurrentBiology_2018	Sweden_VikingAge
VK322	NorthernEurope	Denmark	866	Margyaran_2020_Nature	Denmark_VikingAge
VK330	NorthernEurope	Denmark	861	Margyaran_2020_Nature	Denmark_VikingAge
VK6	NorthernEurope	Greenland	850	Margyaran_2020_Nature	Greenland_VikingAge
VK387	NorthernEurope	Norway	850	Margyaran_2020_Nature	Norway_VikingAge
VK414	NorthernEurope	Norway	850	Margyaran_2020_Nature	Norway_VikingAge
VK1	NorthernEurope	Greenland	850	Margyaran_2020_Nature	Greenland_VikingAge
VK223	CentralEasternEurope	Russia	850	Margyaran_2020_Nature	Russia_VikingAge
VK108	NorthernEurope	Sweden	850	Margyaran_2020_Nature	Sweden_VikingAge
VK156	CentralEasternEurope	Poland	850	Margyaran_2020_Nature	Poland_VikingAge
VK154	CentralEasternEurope	Poland	850	Margyaran_2020_Nature	Poland_VikingAge
VK157	CentralEasternEurope	Poland	850	Margyaran_2020_Nature	Poland_VikingAge
VK254	CentralEasternEurope	Russia	850	Margyaran_2020_Nature	Russia_VikingAge
VK272	CentralEasternEurope	Russia	850	Margyaran_2020_Nature	Russia_VikingAge
VK159	CentralEasternEurope	Russia	850	Margyaran_2020_Nature	Russia_VikingAge
VK273	CentralEasternEurope	Russia	850	Margyaran_2020_Nature	Russia_VikingAge
VK224	CentralEasternEurope	Russia	850	Margyaran_2020_Nature	Russia_VikingAge
VK494	CentralEasternEurope	Poland	850	Margyaran_2020_Nature	Poland_VikingAge
VK217	NorthernEurope	Sweden	850	Margyaran_2020_Nature	Sweden_VikingAge
VK466	CentralEasternEurope	Russia	850	Margyaran_2020_Nature	Russia_VikingAge
VK171	WesternEurope	UK	850	Margyaran_2020_Nature	Britain_VikingAge
R58	SouthernEurope	Italy	850	Antonio_2019_Science	Italy_Medieval
DA164	CentralEasternEurope	Russia	850	Damgaard_2018_Nature	Russia_IronAge_Alan
VK187	NorthernEurope	Greenland	849	Margyaran_2020_Nature	Greenland_VikingAge
VK410	CentralEasternEurope	Russia	843	Margyaran_2020_Nature	Russia_VikingAge
R57	SouthernEurope	Italy	840	Antonio_2019_Science	Italy_Medieval
R65	SouthernEurope	Italy	840	Antonio_2019_Science	Italy_Medieval
R64	SouthernEurope	Italy	840	Antonio_2019_Science	Italy_Medieval
VK16	CentralEasternEurope	Russia	839	Margyaran_2020_Nature	Russia_VikingAge
TSK-A-26	NorthernEurope	Iceland	825	Ebenesersdottir_Science_2018	Iceland_VikingAge
urm160	NorthernEurope	Sweden	820.05.00	Krzewinska_CurrentBiology_2018	Sweden_VikingAge
VK303	NorthernEurope	Sweden	800	Margyaran_2020_Nature	Sweden_VikingAge
VK398	NorthernEurope	Sweden	800	Margyaran_2020_Nature	Sweden_VikingAge
VK35	NorthernEurope	Sweden	800	Margyaran_2020_Nature	Sweden_VikingAge
VK30	NorthernEurope	Sweden	800	Margyaran_2020_Nature	Sweden_VikingAge
VK402	NorthernEurope	Sweden	800	Margyaran_2020_Nature	Sweden_VikingAge
VK396	NorthernEurope	Sweden	800	Margyaran_2020_Nature	Sweden_VikingAge
VK39	NorthernEurope	Sweden	800	Margyaran_2020_Nature	Sweden_VikingAge
VK22	CentralEasternEurope	Russia	800	Margyaran_2020_Nature	Russia_VikingAge
VK179	NorthernEurope	Greenland	800	Margyaran_2020_Nature	Greenland_VikingAge
VK513	NorthernEurope	Greenland	800	Margyaran_2020_Nature	Greenland_VikingAge
VK184	NorthernEurope	Greenland	800	Margyaran_2020_Nature	Greenland_VikingAge
VK401	NorthernEurope	Sweden	800	Margyaran_2020_Nature	Sweden_VikingAge
VK14	CentralEasternEurope	Russia	800	Margyaran_2020_Nature	Russia_VikingAge
VK400	NorthernEurope	Sweden	800	Margyaran_2020_Nature	Sweden_VikingAge
VK183	NorthernEurope	Greenland	800	Margyaran_2020_Nature	Greenland_VikingAge
VK404	NorthernEurope	Sweden	800	Margyaran_2020_Nature	Sweden_VikingAge
VK15	CentralEasternEurope	Russia	800	Margyaran_2020_Nature	Russia_VikingAge
VK399	NorthernEurope	Sweden	800	Margyaran_2020_Nature	Sweden_VikingAge
VK29	NorthernEurope	Sweden	800	Margyaran_2020_Nature	Sweden_VikingAge
VK306	NorthernEurope	Sweden	800	Margyaran_2020_Nature	Sweden_VikingAge
VK406	NorthernEurope	Sweden	800	Margyaran_2020_Nature	Sweden_VikingAge
VK308	NorthernEurope	Sweden	800	Margyaran_2020_Nature	Sweden_VikingAge
VK220	CentralEasternEurope	Russia	800	Margyaran_2020_Nature	Russia_VikingAge
VK407	NorthernEurope	Sweden	800	Margyaran_2020_Nature	Sweden_VikingAge
VK31	NorthernEurope	Sweden	800	Margyaran_2020_Nature	Sweden_VikingAge
VK34	NorthernEurope	Sweden	800	Margyaran_2020_Nature	Sweden_VikingAge
VK40	NorthernEurope	Sweden	800	Margyaran_2020_Nature	Sweden_VikingAge
VK403	NorthernEurope	Sweden	800	Margyaran_2020_Nature	Sweden_VikingAge
VK42	NorthernEurope	Sweden	800	Margyaran_2020_Nature	Sweden_VikingAge
VK309	NorthernEurope	Sweden	800	Margyaran_2020_Nature	Sweden_VikingAge
VK409	CentralEasternEurope	Russia	800	Margyaran_2020_Nature	Russia_VikingAge
VK18	CentralEasternEurope	Russia	800	Margyaran_2020_Nature	Russia_VikingAge
VK23	CentralEasternEurope	Russia	800	Margyaran_2020_Nature	Russia_VikingAge
VK17	CentralEasternEurope	Russia	800	Margyaran_2020_Nature	Russia_VikingAge
VK395	NorthernEurope	Sweden	800	Margyaran_2020_Nature	Sweden_VikingAge
VK397	NorthernEurope	Sweden	800	Margyaran_2020_Nature	Sweden_VikingAge
VK24	NorthernEurope	Faroes	800	Margyaran_2020_Nature	Faroe_VikingAge
VK425	NorthernEurope	Sweden	800	Margyaran_2020_Nature	Sweden_VikingAge
VK427	NorthernEurope	Sweden	800	Margyaran_2020_Nature	Sweden_VikingAge
VK424	NorthernEurope	Sweden	800	Margyaran_2020_Nature	Sweden_VikingAge
VK426	NorthernEurope	Sweden	800	Margyaran_2020_Nature	Sweden_VikingAge
VK218	CentralEasternEurope	Russia	800	Margyaran_2020_Nature	Russia_VikingAge
VK405	NorthernEurope	Sweden	800	Margyaran_2020_Nature	Sweden_VikingAge
VK21	CentralEasternEurope	Russia	800	Margyaran_2020_Nature	Russia_VikingAge
VK408	CentralEasternEurope	Russia	800	Margyaran_2020_Nature	Russia_VikingAge
VK19	CentralEasternEurope	Russia	800	Margyaran_2020_Nature	Russia_VikingAge
VK534	SouthernEurope	Italy	800	Margyaran_2020_Nature	Italy_Medieval
VK527	NorthernEurope	Sweden	800	Margyaran_2020_Nature	Sweden_VikingAge
VK99	NorthernEurope	Iceland	750	Margyaran_2020_Nature	Iceland_VikingAge
VK230	NorthernEurope	Iceland	750	Margyaran_2020_Nature	Iceland_VikingAge
VK101	NorthernEurope	Iceland	750	Margyaran_2020_Nature	Iceland_VikingAge
VK122	NorthernEurope	Iceland	750	Margyaran_2020_Nature	Iceland_VikingAge
VK102	NorthernEurope	Iceland	750	Margyaran_2020_Nature	Iceland_VikingAge
VK225	NorthernEurope	Iceland	750	Margyaran_2020_Nature	Iceland_VikingAge
VK227	NorthernEurope	Iceland	750	Margyaran_2020_Nature	Iceland_VikingAge
VK98	NorthernEurope	Iceland	750	Margyaran_2020_Nature	Iceland_VikingAge
VK160	CentralEasternEurope	Russia	750	Margyaran_2020_Nature	Russia_VikingAge
VK123	NorthernEurope	Iceland	750	Margyaran_2020_Nature	Iceland_VikingAge
VK95	NorthernEurope	Iceland	750	Margyaran_2020_Nature	Iceland_VikingAge
R62	SouthernEurope	Italy	735	Antonio_2019_Science	Italy_Medieval
VK535	SouthernEurope	Italy	713	Margyaran_2020_Nature	Italy_Medieval
VK536	SouthernEurope	Italy	700	Margyaran_2020_Nature	Italy_Medieval
VK537	SouthernEurope	Italy	700	Margyaran_2020_Nature	Italy_Medieval
VK211	CentralEasternEurope	Poland	700	Margyaran_2020_Nature	Poland_VikingAge
VK388	NorthernEurope	Norway	700	Margyaran_2020_Nature	Norway_VikingAge
VK538	SouthernEurope	Italy	700	Margyaran_2020_Nature	Italy_Medieval
IIa	NorthernEurope	Estonia	685	Saag_CurrentBiology_2019	Estonia_Medieval
VK75	NorthernEurope	Greenland	654	Margyaran_2020_Nature	Greenland_VikingAge
VK117	NorthernEurope	Norway	650	Margyaran_2020_Nature	Norway_VikingAge
VK118	NorthernEurope	Norway	650	Margyaran_2020_Nature	Norway_VikingAge
VK114	NorthernEurope	Norway	650	Margyaran_2020_Nature	Norway_VikingAge
VK124	NorthernEurope	Norway	650	Margyaran_2020_Nature	Norway_VikingAge
VK113	NorthernEurope	Norway	650	Margyaran_2020_Nature	Norway_VikingAge
FOV-A-1	NorthernEurope	Iceland	635.05.00	Ebenesersdottir_Science_2018	Iceland_Medieval
R1290	SouthernEurope	Italy	602.05.00	Antonio_2019_Science	Italy_Medieval
R61	SouthernEurope	Italy	595	Antonio_2019_Science	Italy_Medieval
R55	SouthernEurope	Italy	595	Antonio_2019_Science	Italy_Medieval
R54	SouthernEurope	Italy	595	Antonio_2019_Science	Italy_Medieval
R56	SouthernEurope	Italy	595	Antonio_2019_Science	Italy_Medieval
R53	SouthernEurope	Italy	595	Antonio_2019_Science	Italy_Medieval
R52	SouthernEurope	Italy	595	Antonio_2019_Science	Italy_Medieval
VK190	NorthernEurope	Greenland	588	Margyaran_2020_Nature	Greenland_VikingAge
IIf	NorthernEurope	Estonia	575	Saag_CurrentBiology_2019	Estonia_Medieval
R1286	SouthernEurope	Italy	521	Antonio_2019_Science	Italy_Medieval
R1288	SouthernEurope	Italy	521	Antonio_2019_Science	Italy_Medieval
R1287	SouthernEurope	Italy	521	Antonio_2019_Science	Italy_Medieval
R1289	SouthernEurope	Italy	521	Antonio_2019_Science	Italy_Medieval
R1219	SouthernEurope	Italy	510	Antonio_2019_Science	Italy_Medieval
R1224	SouthernEurope	Italy	465	Antonio_2019_Science	Italy_Medieval
R1220	SouthernEurope	Italy	465	Antonio_2019_Science	Italy_Medieval
R1221	SouthernEurope	Italy	465	Antonio_2019_Science	Italy_Medieval
IVLS09KT	NorthernEurope	Estonia	365	Saag_CurrentBiology_2019	Estonia_Medieval
R970	SouthernEurope	Italy	300	Antonio_2019_Science	Italy_Medieval
R973	SouthernEurope	Italy	300	Antonio_2019_Science	Italy_Medieval
R969	SouthernEurope	Italy	300	Antonio_2019_Science	Italy_Medieval
VK240	NorthernEurope	Faroes	250	Margyaran_2020_Nature	Faroe_Historical
VK245	NorthernEurope	Faroes	250	Margyaran_2020_Nature	Faroe_Historical
VK46	NorthernEurope	Faroes	250	Margyaran_2020_Nature	Faroe_Historical
VK237	NorthernEurope	Faroes	250	Margyaran_2020_Nature	Faroe_Historical
VK238	NorthernEurope	Faroes	250	Margyaran_2020_Nature	Faroe_Historical
VK242	NorthernEurope	Faroes	250	Margyaran_2020_Nature	Faroe_Historical
VK244	NorthernEurope	Faroes	250	Margyaran_2020_Nature	Faroe_Historical
VK27	NorthernEurope	Faroes	250	Margyaran_2020_Nature	Faroe_Historical
VK241	NorthernEurope	Faroes	250	Margyaran_2020_Nature	Faroe_Historical
VK25	NorthernEurope	Faroes	250	Margyaran_2020_Nature	Faroe_Historical
VK44	NorthernEurope	Faroes	250	Margyaran_2020_Nature	Faroe_Historical
KOV-A-2	NorthernEurope	Iceland	236	Ebenesersdottir_Science_2018	Iceland_Historical
